# Supplementary material for: Early Estimation of Renal Function After Transplantation to Enable Appropriate Dosing of Critical Drugs: Retrospective Analysis of 103 Patients in a Single Center
Source: Springer Nature journal article supplement (doi:10.1007/s40262-020-00893-z), 2020-05-08

***Clinical Pharmacokinetics***

**Early Estimation of Renal Function After Transplantation to Enable Appropriate Dosing of Critical Drugs: Retrospective Analysis of 103 Patients in a Single Center**

Tobias T. Pieters, Paul Beele, Arjan D. Van Zuilen, Marianne C. Verhaar, Alwin D. R. Huitema, Maarten B. Rookmaaker

**Corresponding author:**

Maarten B. Rookmaaker

Department of Nephrology and Hypertension, Room F03.225,  
UMC Utrecht, Utrecht University, Heidelberglaan 100,  
3584CX Utrecht, The Netherlands.

E-mail: [m.rookmaaker@umcutrecht.nl](mailto:m.rookmaaker@umcutrecht.nl)

**Supplementary Figure 1.** Course of (dynamic) renal function within the first week after transplantation. Mean values with 95% confidence interval at different time points are shown.

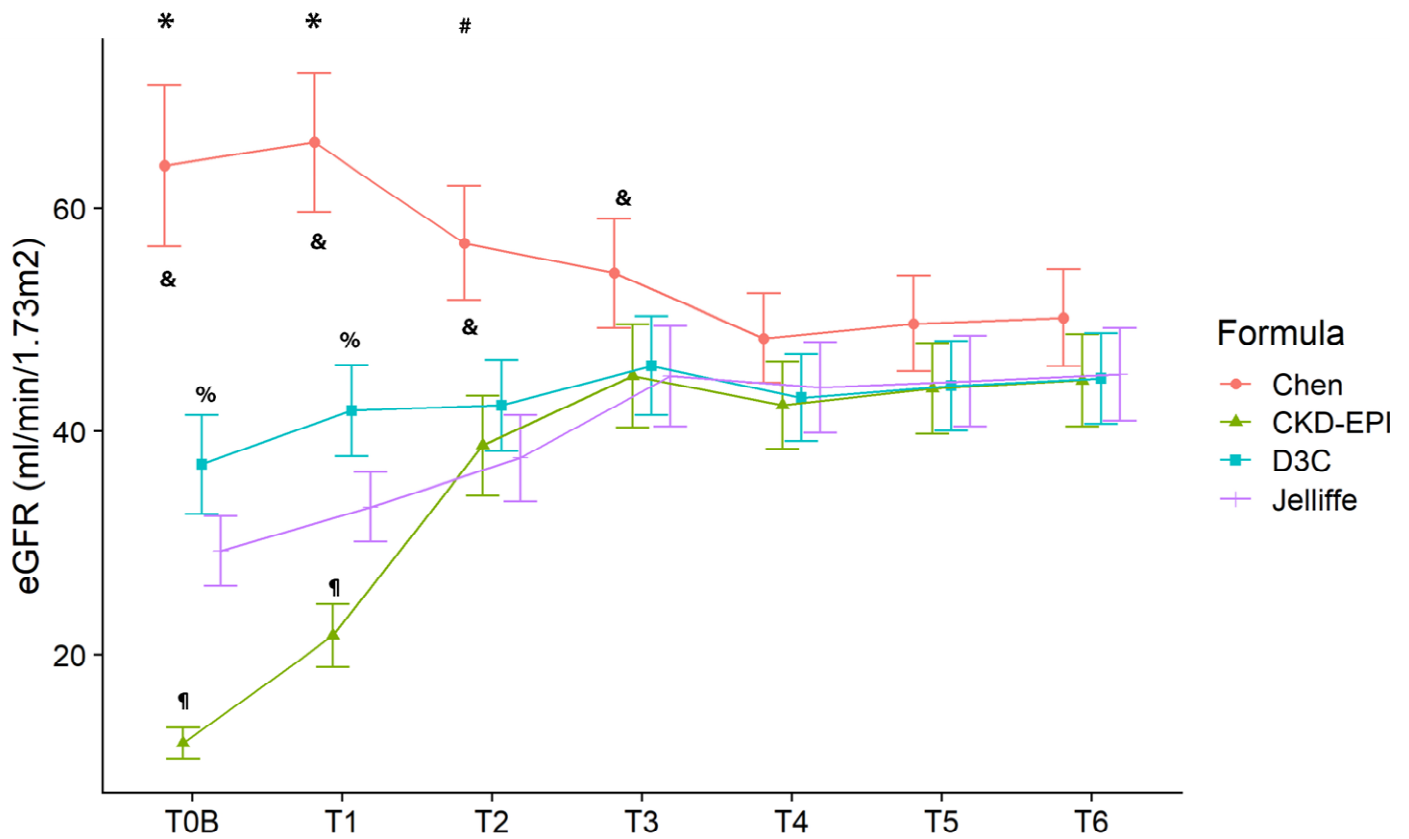

**D3C**

|       |    |    |    |    |    |    |    |
|-------|----|----|----|----|----|----|----|
| <15   | 20 | 15 | 16 | 13 | 11 | 10 | 9  |
| 15-30 | 18 | 14 | 15 | 14 | 19 | 20 | 19 |
| ≥30   | 58 | 73 | 72 | 76 | 73 | 73 | 75 |

**Chen**

|       |    |    |    |    |    |    |    |
|-------|----|----|----|----|----|----|----|
| <15   | 13 | 8  | 9  | 3  | 4  | 4  | 2  |
| 15-30 | 9  | 10 | 11 | 15 | 16 | 16 | 18 |
| ≥30   | 74 | 84 | 83 | 85 | 83 | 83 | 83 |

**Jelliffe**

|       |    |    |    |    |    |    |    |
|-------|----|----|----|----|----|----|----|
| <15   | 21 | 14 | 15 | 12 | 10 | 10 | 6  |
| 15-30 | 34 | 30 | 21 | 16 | 19 | 19 | 22 |
| ≥30   | 41 | 58 | 67 | 75 | 74 | 74 | 75 |

**CKD-EPI**

|       |    |    |    |    |    |    |    |
|-------|----|----|----|----|----|----|----|
| <15   | 76 | 42 | 19 | 14 | 13 | 11 | 10 |
| 15-30 | 18 | 43 | 25 | 17 | 17 | 19 | 19 |
| ≥30   | 2  | 18 | 59 | 72 | 73 | 73 | 74 |

CKD-EPI Chronic Kidney Disease Epidemiology Collaboration, D3C dynamic creatinine clearance calculation, DRFFs different dynamic renal function formulas, KeGFR kinetic estimated glomerular filtration rate.

Significant difference between formulas was calculated using repeated measures ANOVA with paired *t* tests and Bonferroni correction as post hoc test. \**p* < 0.001 between all groups, #*p* < 0.05 between all groups, &*p* < 0.001 D3C vs. Chen, %*p* < 0.05 D3C vs. Jelliffe, and ¶*p* < 0.001 D3C vs. CKD-EPI. In addition, the number of patients with different eGFR classifications per formula per time point are shown.

**Supplementary Figure 2.** Scatter plots of all kinetic formulas calculated in the morning (median time 08:00 h) and 24-h urine creatinine clearance (CrCl) collected in the evening (from T0 22:00 h to T1 22:00 h) 1 day after transplantation. The *dotted line* represents the line of identity. The regression line (*solid line*) was calculated using ordinary least squares regression

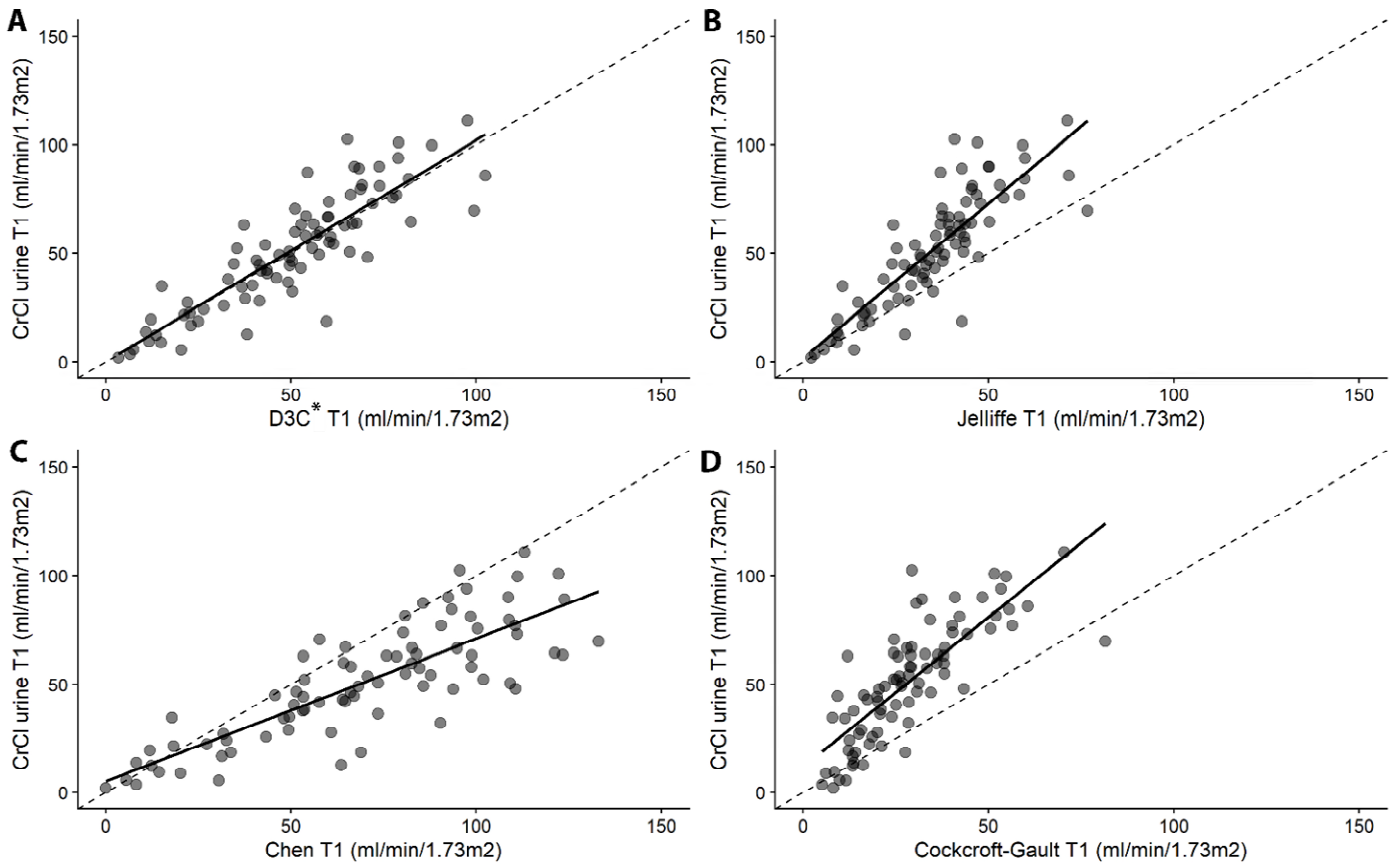

Supplement: MOESM1 [file 17965406]
